# Supplementary material
Source: MDPI journal article supplement (https://www.mdpi.com/2073-4344/12/4/364)
Supplement: s1 [file s1]

# Cerium-Copper Oxides Synthesized in a Multi-Inlet Vortex Reactor as Effective Nanocatalysts for CO and Ethene Oxidation Reactions

Melodj Dosa, Miguel Jose Marin-Figueredo, Enrico Sartoretti, Chiara Novara, Fabrizio Giorgis, Samir Bensaid, Debora Fino, Nunzio Russo and Marco Piumetti \*

Department of Applied Science and Technology, Politecnico di Torino, Corso Duca degli Abruzzi 24, 10129 Turin, Italy; melodj.dosa@polito.it (M.D.); miguel.marinfigueredo@polito.it (M.J.M.-F.); enrico.sartoretti@polito.it (E.S.); chiara.novara@polito.it (C.N.); fabrizio.giorgis@polito.it (F.G.); samir.bensaid@polito.it (S.B.); debora.fino@polito.it (D.F.) nunzio.russo@polito.it (N.R.)  
\* Correspondence: marco.piumetti@polito.it; Tel.: +39-011-090-4753

## Supporting information section

**Table S1.** EDX of the CuCeO<sub>x</sub> catalysts: the elemental content is expressed in percentage (wt.%) of each element in the catalysts.

| Catalysts             | Ce | O  | Cu | Tot. |
|-----------------------|----|----|----|------|
| 5%CuCeO <sub>x</sub>  | 78 | 19 | 2  | 100  |
| 10%CuCeO <sub>x</sub> | 72 | 22 | 6  | 100  |
| 20%CuCeO <sub>x</sub> | 63 | 24 | 14 | 100  |
| 30%CuCeO <sub>x</sub> | 55 | 18 | 27 | 100  |
| 60%CuCeO <sub>x</sub> | 26 | 20 | 54 | 100  |

\*The values are estimated over three different areas.

**Table S2.** Pearson correlation coefficients between some structural or chemical properties of the mixed oxides and their catalytic activity for CO oxidation, in terms of specific reaction rates (reported in Table 6).

| Parameter of Interest                               | Correlation Coefficient With the Reaction Rate of CO Oxidation |
|-----------------------------------------------------|----------------------------------------------------------------|
| Relative abundance of O <sub>α</sub> species        | 0.95                                                           |
| Relative abundance of Ce <sup>3+</sup> species      | 0.80                                                           |
| Abundance of defect sites (D/F <sub>2g</sub> ratio) | 0.91                                                           |

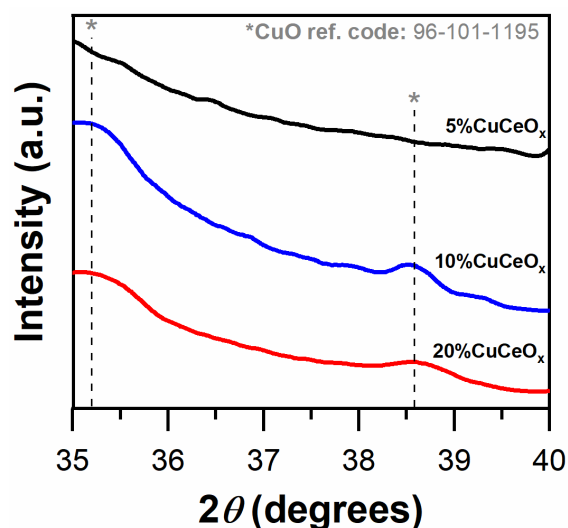

**Figure S1.** XRD magnification in the range 35–40° for the 5, 10 and 20 wt.% Cu samples. The typical peaks of CuO are marked with asterisks.

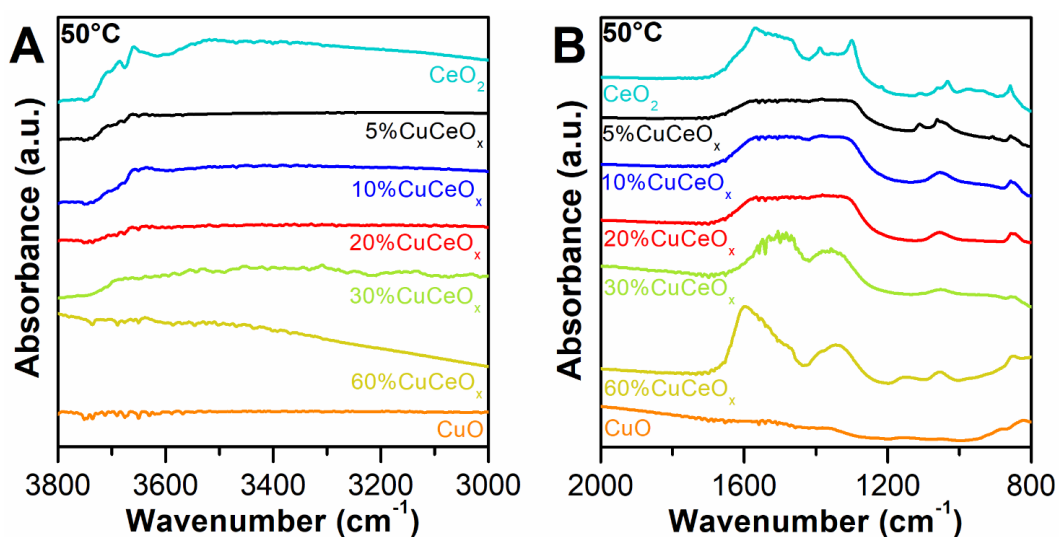

**Figure S2.** Normalized FT-IR spectra of the different catalysts outgassed at 50 °C in the (A) 3800–3000 cm<sup>-1</sup> and (B) 2000–800 cm<sup>-1</sup> range.

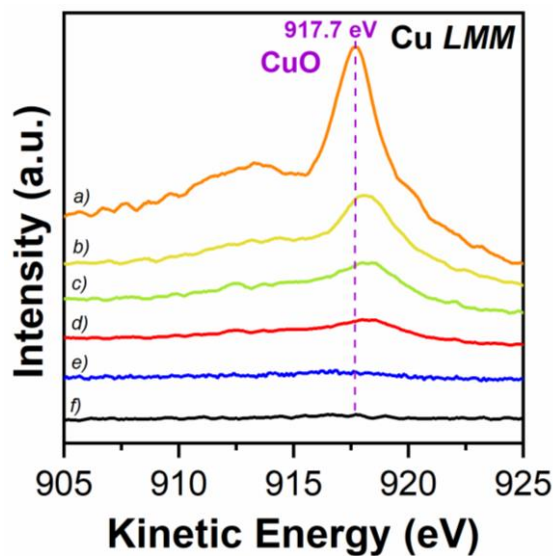

**Figure S3.** Cu LMM Auger spectra of a) CuO, b) 60%CuCeO<sub>x</sub>, c) 30%CuCeO<sub>x</sub>, d) 20%CuCeO<sub>x</sub>, e) 10%CuCeO<sub>x</sub>, f) 5%CuCeO<sub>x</sub>.

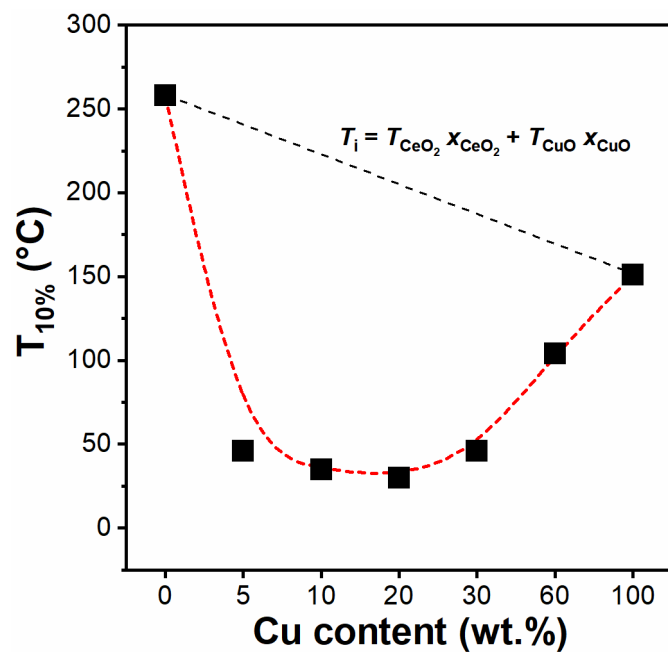

**Figure S4.**  $T_{10\%}$  accomplished over the powder catalysts as a function of the Cu wt.% during the catalytic oxidation of CO.

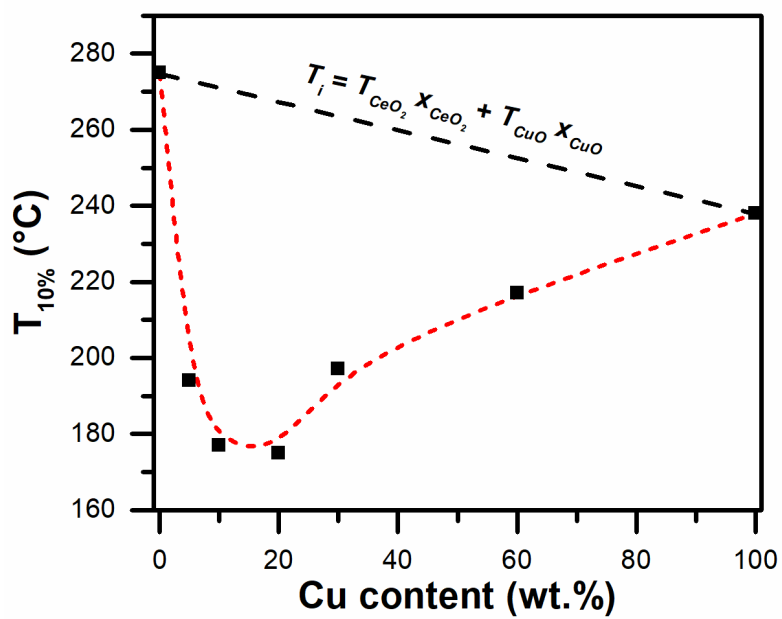

**Figure S5.**  $T_{10\%}$  accomplished over the powder catalysts as a function of the Cu wt.% during the catalytic oxidation of ethene.

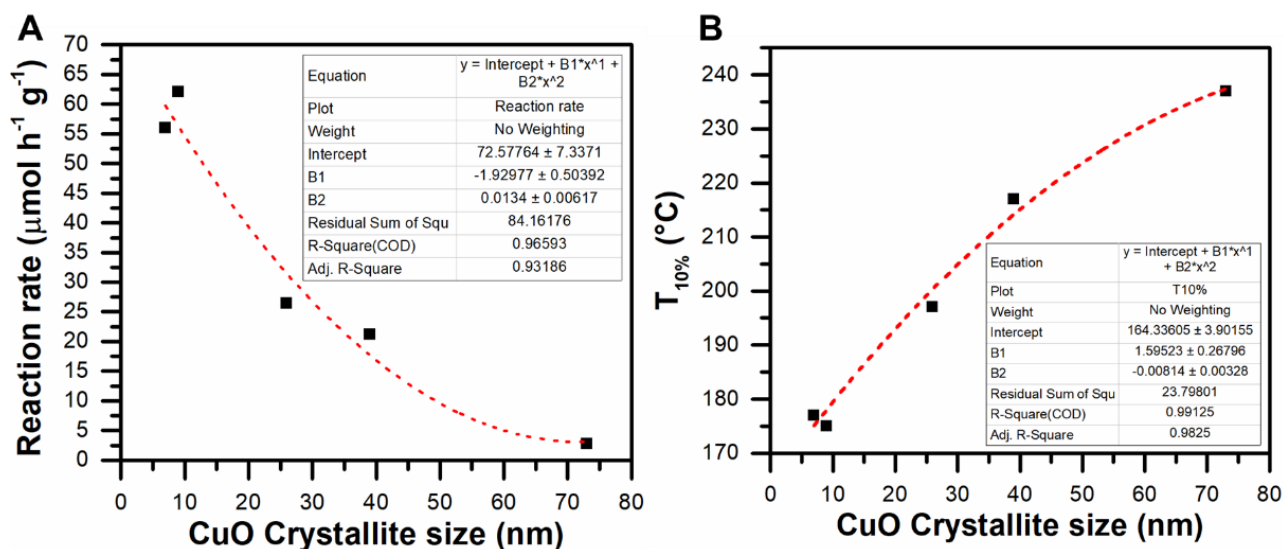

**Figure S6.** Catalytic activity trend observed during the ethene abatement tests with the ceria-based catalysts, in terms of A) ethene specific reaction rate and B) temperature for achieving 10% conversion of ethene.

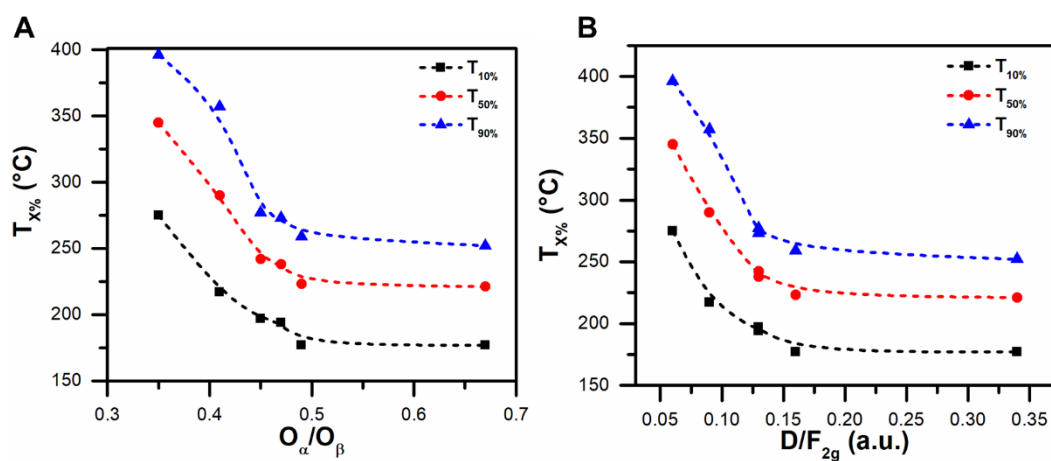

**Figure S7.** Catalytic activity performance trend (in terms of  $T_{x\%}$ ) for the ethene oxidation reaction over the ceria-based catalysts, as a function of A) the  $O_{\alpha}/O_{\beta}$  ratio and B) the amount of defect sites ( $D/F_{2g}$  ratio).
